# Supplementary material for: Multicomponent Materials to Improve Solubility: Eutectics of Drug Aminoglutethimide
Source: MDPI journal article supplement (doi:10.3390/cryst12010040), 2021-12-28
Supplement: s1 [file s1]

## Supporting Information

### Multicomponent Materials to Improve Solubility: Eutectics of Drug Aminogluthethimide

Basanta Saikia, Andreas Seidel -Morgenstern and Heike Lorenz

Max Planck Institute for Dynamics of Complex Technical Systems, Magdeburg 39106, Germany

E-mail: bsaikia1@gmail.com, saikia@mpi-magdeburg.mpg.de

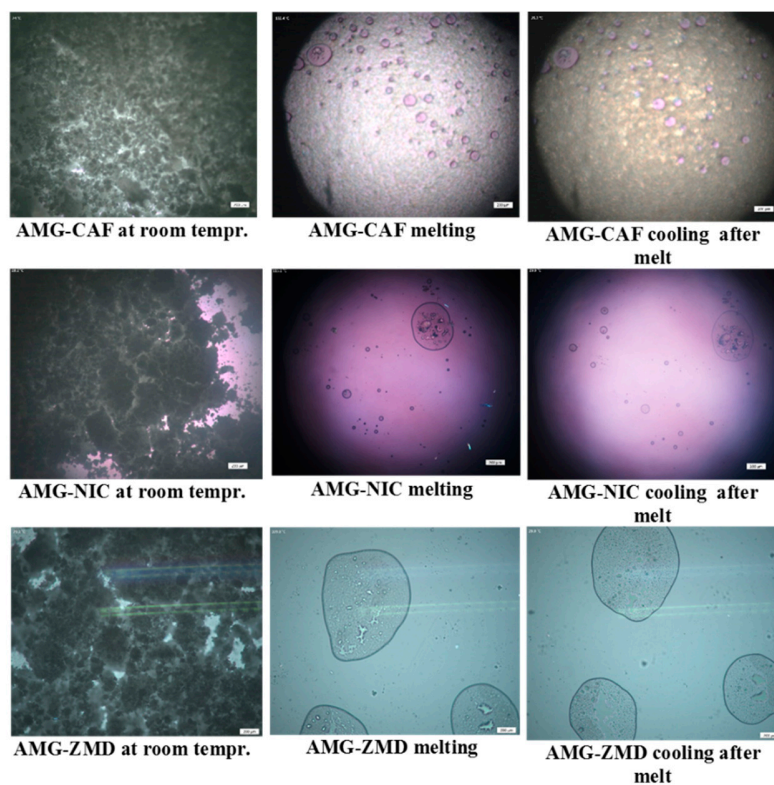

**Figure S1.** Comparison of Hot Stage Microscopic images for the eutectic mixtures at room temperature, melting and subsequent cooling.

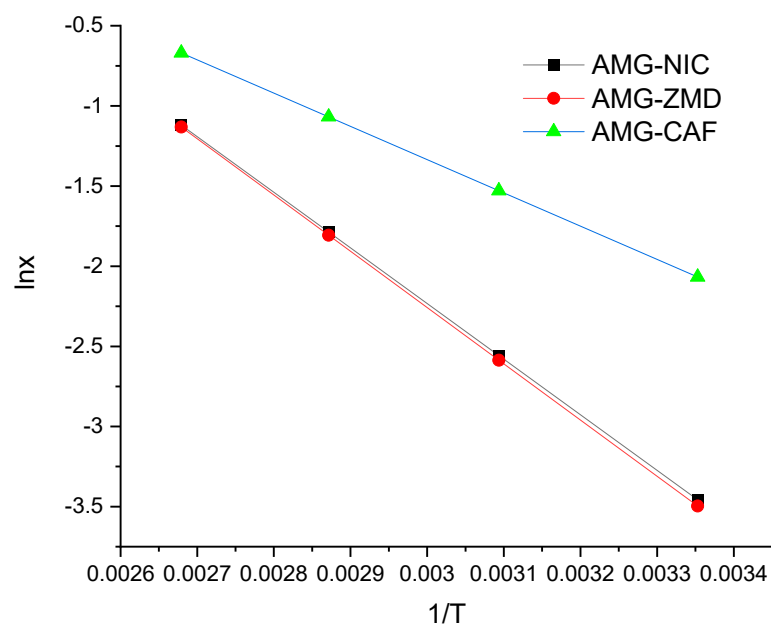

**Figure S2.** Van't Hoff plots of ideal solubility values for the eutectics.

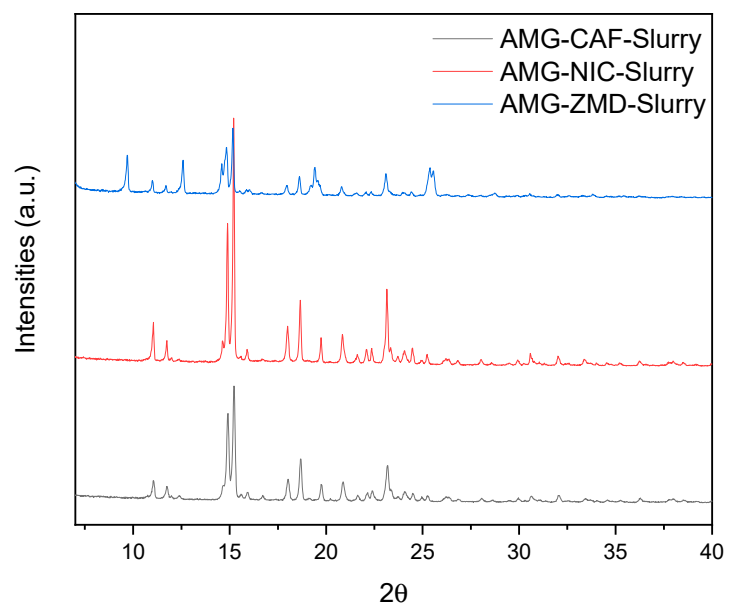

**Figure S3.** PXRD of the AMG eutectics after the solubility determinations.
